# Supplementary material for: A ratiometric colorimetric detection of the folate receptor based on terminal protection of small-molecule-linked DNA
Source: Royal Society of Chemistry journal article supplement (doi:10.1039/c4an02115k), 2014-12-11
Supplement: c4an02115k1.pdf [file c4an02115k1.pdf]

## Supporting Information

### **A ratiometric colorimetric detection of folate receptor based on terminal protection of small-molecule-linked DNA**

Guangfeng Wang<sup>a,b\*</sup>, Yanhong Zhu<sup>a</sup>, Liang Sha<sup>a</sup>, Yuwei Qiu<sup>a</sup>, Ling Chen<sup>a</sup>, Xiaojun Zhang<sup>a,b</sup>

<sup>a</sup> Anhui Key Laboratory of Chem-Biosensing, College of Chemistry and Materials Science, Center for Nanoscience and Nanotechnology Anhui Normal University, Wuhu, 241000, P. R. China

<sup>b</sup> State Key Laboratory of Chemo/Biosensing and Chemometrics, Hunan University, Changsha, 410082, PR China

E-mail: [wangyuz@mail.ahnu.edu.cn](mailto:wangyuz@mail.ahnu.edu.cn)

- 1. Experimental Section**
- 2. Optimization of the experimental conditions**
- 3. Comparison of detection limit between the proposed method with other reported detection methods for FR**
- 4. Colorimetric detection of the standard FR concentrations in serum samples**

## 1. Experimental Section

### 1.1 Reagents and materials

HPLC-purified oligonucleotides (sequences are (5' to 3') S1: CAGCTGCTGGTA-HS-SH C6; S2: CAGCAGCTGCTACAGCAGCTG- C6 NH<sub>2</sub>) were obtained from Sangon Biotechnology Co. Ltd. (Shanghai, China). Tris (hydroxymethyl) aminomethane (Tris), trisodium citrate, Exonuclease (Exo I), 1-ethyl-3-(3-dimethyl-aminopropyl) carbodiimide hydrochloride (EDC), N-hydroxysulfosuccinimide (Sulfo-NHS), bovine serum albumin (BSA), thrombin, and other reagents were obtained from the Sinopharm Chemical Reagent Co. Ltd. (Shanghai, China). HAuCl<sub>4</sub>, FA and FR were purchased from Sigma Aldrich Chemical Co. NEB buffer I was purchased from New England Biolabs (Beijing, China). Ultrapure water obtained through PSDK2-10-C (Beijing, China) was used throughout the experiments.

### 1.2 Preparation of Au NPs

All glassware used in the following procedures were cleaned in a bath of freshly prepared solution of HNO<sub>3</sub>-HCl (1 : 3, v/v), rinsed thoroughly in ultrapure water and dried in air. The 13 nm AuNPs were prepared by the classical citrate reduction route with a slight modification<sup>1</sup>. Briefly, a sodium citrate solution (2 mL, 1 mg/mL) was rapidly added to a boiled HAuCl<sub>4</sub> solution (50 mL, 1 mg/mL) under vigorous stirring. The mixed solution was boiled for 30 min and further stirred for 15 min to ensure complete reduction. The resulting wine-red solution was cooled to room temperature gradually and filtered by a filter film (The pore size: <0.45 μm) to remove the impurities, and the filtrate was stored at 4 °C. The average diameter of Au NPs was verified by the scanning electron microscope (SEM) (Hitachi S-4800, Japan). The concentration of the AuNPs was estimated by UV-vis spectroscopy based on an extinction coefficient of 2.7×10<sup>8</sup> M<sup>-1</sup>cm<sup>-1</sup> at 516 nm for 13 nm particles.

### 1.3 Preparation of S1modified Au NPs (S1-AuNPs)

Thiolated DNA modified Au NPs were prepared according to the procedure described previously with minor modification<sup>1</sup>. In brief, 0.5 mL 40 nM S1 solution was gradually added to 5 mL of the concentrated Au NPs solution under stirring conditions and incubated for 16 h at room temperature; subsequently, 10 mM phosphate buffer solution (PBS, pH 7.4) was added drop-by-drop while stirring (called the 'salt aging process'); then, after incubation overnight (40 h), the unbound oligonucleotides were removed via centrifugation at 12 000 rpm for 25 min followed by resuspension of the sediment in 1 mL of 10 mM PBS (300 mM NaCl, pH 7.4). This step was repeated three times to sufficiently remove the excess oligonucleotides, and stored at 4 °C prior to the use for the detection of FR.

### 1.4 Preparation of FR protected FA-linked S2 (cross-linker: FR/FA-S2)

FA was conjugated to the amine moiety of the S2 at 3' end using the succinimide coupling (EDC-NHS) method. Briefly, 0.5 mL S2 (20 μM) was mixed with 0.5 mL Tris-HCl (100 mM, pH 7.4) containing 10 mM folate, 1 mM EDC, and 5 mM Sulfo-NHS, and incubated for 3 h at 37 °C in the dark. The final product (FA-S2) solution was then dialyzed against PBS buffer (pH 7.4) using a membrane with molecular weight cutoff of 1000 Da to remove excessive folate. Afterwards, a series of varying concentrations of FR were employed into the preceding solutions for sufficiently incubating at 37 °C for another 2 h in the dark. Finally, through acceding respectively to 400 U/mL Exo I-containing working buffer (50 units Exo I in 50 μL of 2× NEB buffer I), the aforementioned mixture solutions were sustained for about 30 min at 37 °C and terminated by an 80 °C water-bath for 20 min for hydrolyzing absolutely. After cooling to room temperature, the cross-linker that FA-S2 with different concentrations of FR (FR/FA-S2) was fabricated.

## 1.5 Terminal protection-based colorimetric assay for FR

Typically, 400  $\mu\text{L}$  of the above prepared S1-AuNP solution was mixed with 200  $\mu\text{L}$  of the prepared FR/FA-S2 solution and shaken for 5 min gently to get a stable solution. After 2 h duration at 37  $^{\circ}\text{C}$  in the dark, the solution was transferred into centrifuge tube. Finally, the color changes were detected by the naked eye and/or by recording the UV-vis absorption spectra on a UV-3010 spectrometer (Hitachi, Japan). The photographs were taken with a digital camera, and the absorption measurements were performed using a UV-vis spectrophotometer with 1 mm slit width cell between 400 and 800 nm. The sensor responses were calculated by dividing the extinction of the S1-AuNP suspension at 650 nm by the extinction at 520 nm ( $A_{650}/A_{520}$ ).

1 J. J. Storhoff, R. Elghanian, R. C. Mucic, C. A. Mirkin and R. L. Letsinger, *J. Am. Chem. Soc.*, 1998, **120**, 1959-1964.

## 2. Optimization of the experimental conditions

Based on the proposed strategy, a series of experimental conditions were conducted to establish the optimum analytical conditions for the detection of FR. Considering the potential false-positive results caused by the residual folate-linked S2 which are not hydrolyzed by Exo I, in the absence of FR we have studied the required minimum concentration of Exo I and digestion time by measuring the absorbance. As shown in Fig. S1A, the absorbance ratio of  $A_{650}/A_{520}$  reduced with the increase of Exo I concentration from 0 to 800 U/mL. At the same time, we detected the signals at different digestion times in the presence of 400 U/mL Exo I. Experimental results showed increased progressively until 30 min and then reached a plateau (Fig. S1B). Hence, 400 U/mL of Exo I and 30 min digestion time were chosen as the optimized conditions. As shown in Fig. S1C, a longer hybridization time between S1 and S2 would be better for the detection sensitivity. Nevertheless, considering that a short-time analysis is highly desired and 2 h is enough for the sensitive determination, we have chosen the 2 h hybridization time for the following detection.

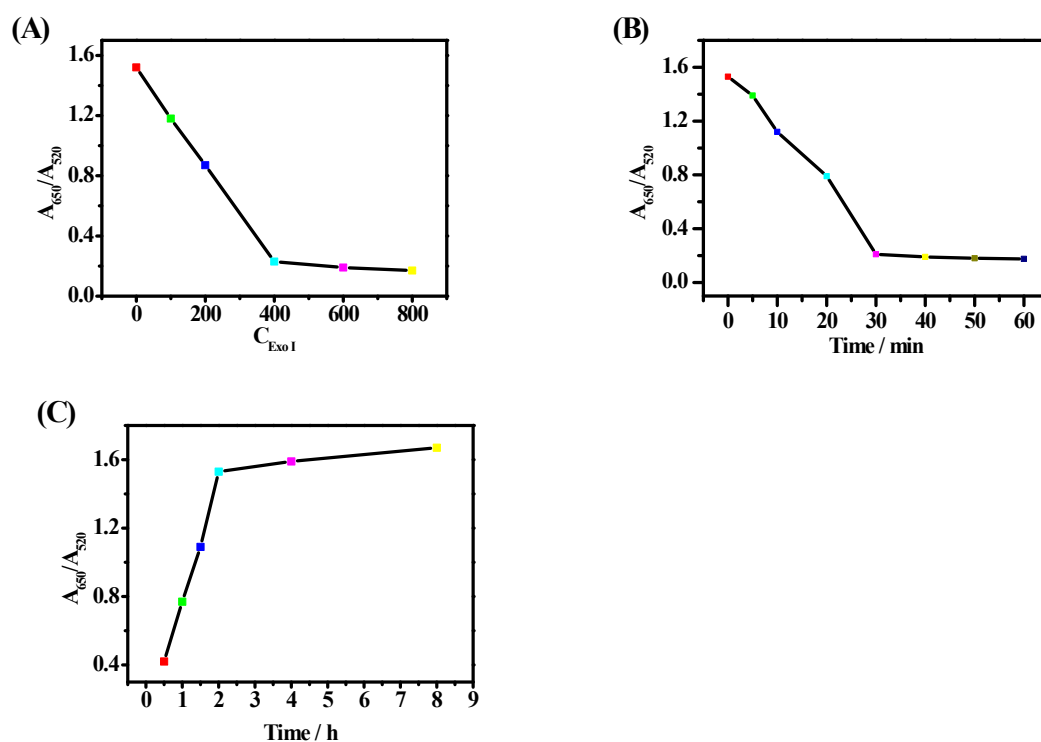

**Fig. S1** (A) Effect of the concentration of Exo I on the detection performed in the absence of FR. (B) Effect of Exo I digestion time on the detection performed in the absence of FR. (C) Effect of the hybridization time between S1 and FR/FA-S2 on the detection performed in the presence of FR

### 3. Comparison of detection limit between the proposed method with other reported detection methods for FR

| Method/System                                                       | Linear range                  | Detection limit                                                                 | Features                                           | Ref.      |
|---------------------------------------------------------------------|-------------------------------|---------------------------------------------------------------------------------|----------------------------------------------------|-----------|
| Fluorescence, RCA*                                                  | 1 pM-2.5 nM                   | 0.8 pM (about 0.03 ng/mL)                                                       | Low detection limit, but cumbersome                | 1         |
| Fluorescence, Exo III-assisted G-quadruplex releasing               | 1 nM-100 nM                   | 30 nM (about )                                                                  | Label free, but low sensitivity                    | 2         |
| Fluorescence, PEI-coated CdS-ZnS QDs                                | 0.2-1.2 $\mu\text{g mL}^{-1}$ | 10 ng/mL                                                                        | Highly complex process, and low sensitivity        | 3         |
| Electrochemistry, Exo III-assisted recycling*                       | 0.3–15 ng/mL                  | 0.19 ng/mL                                                                      | high sensitivity                                   | 4         |
| Electrochemistry, selective CNTs assembly                           | 10 pM-1.0 nM                  | 3 pM (about 0.114 ng/mL)                                                        | high sensitivity                                   | 5         |
| Colorimetry, DNA-functionalized Au NPs, Exo III-assisted recycling* | 0.1 - 10 pM                   | 50 fM in UV-vis spectrometry; 10 pM (about 0.38 ng/mL) for direct visualization | High sensitivity and visualization, but cumbersome | 6         |
| Colorimetry, DNA-functionalized Au NPs                              | 0.5-50 ng/mL                  | 0.33 ng/mL for direct visualization                                             | Low detection limit, and visualization             | This work |

**\*: amplified detection**

1. L. J. Ou, H. B. Wang and X. Chu, *Analyst* 2013, **138**, 7218–7223
2. X F. Wei, W. L. Lin, N. Ma, F. Luo, Z.Y. Lin, L.H. Guo, B. Qiu and G.N. Chen, *Chem. Commun.*, 2012, **48**, 6184–6186
3. Y. Zhang, J. M. Liu and X.P. Yan, *Anal. Chem.*, 2013, **85**, 228–234
4. Y. Cao, S. Zhu, J. C. Yu, X. J. Zhu, Y. M. Yin and G. X. Li, *Anal. Chem.*, 2012, **84**, 4314–4320
5. Z. Wu, Z. Zhen, J. H. Jiang, G. L. Shen and R.Q. Yu, *J. Am. Chem. Soc.*, 2009, **131**, 12325–12332
6. X. J. Yang and Z. Q. Gao, *Nanoscale*, 2014, **6**, 3055.

**4. Colorimetric detection of the standard FR concentrations in serum samples**

| samples | Standard FR concentration (ng/mL) | FR concentration detected by proposed method (ng/mL) | Relative error (%) |
|---------|-----------------------------------|------------------------------------------------------|--------------------|
| 1       | 1                                 | 0.94                                                 | 6                  |
| 2       | 5                                 | 4.76                                                 | 4.8                |
| 3       | 10                                | 9.72                                                 | 2.8                |
| 4       | 15                                | 14.47                                                | 3.5                |

Table S2 Colorimetric detection of the standard FR concentrations in serum samples
